# Supplementary material
Source: ML conference proceedings conference paper supplement (https://openreview.net/forum?id=1PRnYiuJkQx)
Supplement: supplementary_material [file attachment]

## Supplementary Material

This supplementary material contains the proofs and results omitted from the main body. In Appendix A we recall the appropriate version of the Stokes' theorem and discuss its applicability for Lipschitz functions on  $B_1^d$ . In Appendix B we provide the proof of Lemma 3. Finally, in Appendix C we provide the proofs of Theorems 1, 2, 3, 4.

**Additional notation** For two functions  $g, \eta : \mathbb{R}^d \rightarrow \mathbb{R}$ , we denote by  $\eta \star g$  their convolution defined point-wise for  $\mathbf{x} \in \mathbb{R}^d$  as

$$(\eta \star g)(\mathbf{x}) = \int_{\mathbb{R}^d} \eta(\mathbf{x} - \mathbf{x}')g(\mathbf{x}') \, d\mathbf{x}' .$$

The standard mollifier  $\eta_\epsilon : \mathbb{R}^d \rightarrow \mathbb{R}$  is defined as  $\eta_\epsilon(\mathbf{x}) = \epsilon^{-d}\eta_1(\mathbf{x}/\epsilon)$  for  $\epsilon > 0$  and  $\mathbf{x} \in \mathbb{R}^d$ , where  $\eta_1 : \mathbb{R}^d \rightarrow \mathbb{R}$  is defined as

$$\eta_1(\mathbf{x}) = \begin{cases} C \exp\left(\frac{1}{\|\mathbf{x}\|_2^2 - 1}\right) & \text{if } \|\mathbf{x}\|_2 \leq 1 \\ 0 & \text{otherwise} \end{cases} ,$$

with  $C$  chosen so that  $\int_{\mathbb{R}^d} \eta_1(\mathbf{x}) \, d\mathbf{x} = 1$ .

### A Integration by parts

We first recall the following result that can be found in [34, Section 13.3.5, Exercise 14a].

**Theorem 5** (Integration by parts in a multiple integral). *Let  $D$  be an open connected subset of  $\mathbb{R}^d$  with a piecewise smooth boundary  $\partial D$  oriented by the outward unit normal  $\mathbf{n} = (n_1, \dots, n_d)^\top$ . Let  $g$  be a continuously differentiable function in  $D \cup \partial D$ . Then*

$$\int_D \nabla g(\mathbf{u}) \, d\mathbf{u} = \int_{\partial D} g(\boldsymbol{\zeta})\mathbf{n}(\boldsymbol{\zeta}) \, dS(\boldsymbol{\zeta}) .$$

**Remark 2.** We refer to [34, Section 12.3.2, Definitions 4 and 5] for the definition of piecewise smooth surfaces and their orientations respectively.

The idea of using the instance of Theorem 5 (also called Stokes' theorem) with  $D = B_2^d$  to obtain  $\ell_2$ -randomized estimators of the gradient belongs to Nemirovsky and Yudin [22]. It was further used in several papers [5, 16, 31, 33] to mention just a few. Those papers were referring to [22] but [22] did not provide an exact statement of the result (nor a reference) and only tossed the idea in a discussion. However, the classical analysis formulation as presented in Theorem 5 does not apply to Lipschitz continuous functions that were considered in [5, 16, 31, 33]. We are not aware of whether its extension to Lipschitz continuous functions, though rather standard, is proved in the literature.

In this paper, we apply Theorem 5 with the  $\ell_1$ -ball  $D = B_1^d$ . Our aim in this section is to provide a variant of Theorem 5 applicable to a Lipschitz continuous function  $g : \mathbb{R}^d \rightarrow \mathbb{R}$ , which is not necessarily continuously differentiable on  $D \cup \partial D = B_1^d \cup \partial B_1^d$ . To this end, we will go through the argument of approximating  $g$  by  $C^\infty(\Omega)$  functions, where  $\Omega \subset \mathbb{R}^d$  is an open bounded connected subset of  $\mathbb{R}^d$  such that  $D \cup \partial D \subset \Omega$ . Let  $g_n = \eta_{1/n} \star g$ , where  $\eta_{1/n}$  is the standard mollifier. Let  $g : \mathbb{R}^d \rightarrow \mathbb{R}$  be a function satisfying the Lipschitz condition w.r.t. the  $\ell_1$ -norm:  $|g(\mathbf{u}) - g(\mathbf{u}')| \leq L\|\mathbf{u} - \mathbf{u}'\|_1$ . Since  $g$  is continuous in  $\Omega$  and, by construction  $D \cup \partial D \subset \Omega$ , then using basic properties of mollification [see e.g., 15, Theorem 4.1 (ii)] we have

$$g_n \longrightarrow g$$

uniformly on  $D \cup \partial D$  (in particular, uniformly on  $\partial D$ ). Furthermore, let  $\nabla g$  be the gradient of  $g$ , which by Rademacher theorem [see e.g., 15, Theorem 3.2] is well defined almost everywhere w.r.t. the Lebesgue measure and

$$\|\nabla g(\mathbf{u})\|_\infty \leq L \quad \text{a.e.}$$

It follows that  $\frac{\partial g}{\partial u_j}$  is absolutely integrable on  $\Omega$  for any  $j \in [d]$ . Furthermore, since

$$\frac{\partial g_n}{\partial u_j} = \eta_{1/n} \star \left( \frac{\partial g}{\partial u_j} \right) ,$$

we can apply [15, Theorem 4.1 (iii)] that yields

$$\int_D \|\nabla g_n(\mathbf{u}) - \nabla g(\mathbf{u})\|_2 \, d\mathbf{u} \longrightarrow 0 .$$

Combining the above remarks we obtain that the result of Theorem 5 is valid for functions  $g$  that are Lipschitz continuous w.r.t. the  $\ell_1$ -norm. Thus, it is also valid when the Lipschitz condition is imposed w.r.t. any  $\ell_q$ -norm with  $q \in [1, \infty]$ . Specifying this conclusion for the particular case  $D = B_1^d$ , we obtain the following theorem.

**Theorem 6.** *Let the function  $g : \mathbb{R}^d \rightarrow \mathbb{R}$  be Lipschitz continuous w.r.t. the  $\ell_q$ -norm with  $q \in [1, \infty]$ . Then*

$$\int_{B_1^d} \nabla g(\mathbf{u}) \, d\mathbf{u} = \frac{1}{\sqrt{d}} \int_{\partial B_1^d} g(\zeta) \operatorname{sign}(\zeta) \, dS(\zeta) ,$$

where  $\nabla g(\cdot)$  is defined up to a set of zero Lebesgue measure by the Rademacher theorem.

## B Proof of Lemma 3

To prove Lemma 3, we first recall the weighted Poincaré inequality for the univariate exponential measure (mean 0 and scale parameter 1 Laplace distribution).

**Lemma 5** (Lemma 2.1 in [9]). *Let  $W$  be mean 0 and scale parameter 1 Laplace random variable. Let  $g : \mathbb{R} \rightarrow \mathbb{R}$  be continuous almost everywhere differentiable function such that*

$$\mathbf{E}[|g(W)|] < \infty \quad \text{and} \quad \mathbf{E}[|g'(W)|] < \infty \quad \text{and} \quad \lim_{|w| \rightarrow \infty} g(w) \exp(-|w|) = 0 ,$$

then,

$$\mathbf{E}[(g(W) - \mathbf{E}[g(W)])^2] \leq 4\mathbf{E}[(g'(W))^2].$$

We are now in a position to prove Lemma 3. The proof is inspired by [7, Lemma 2].

*Proof of Lemma 3.* Throughout the proof, we assume without loss of generality that  $\mathbf{E}[G(\zeta)] = 0$ . Indeed, if it is not the case, we use the result for the centered function  $\tilde{G}(\zeta) = G(\zeta) - \mathbf{E}[G(\zeta)]$ , which has the same gradient.

First, consider the case of continuously differentiable  $G$ . Let  $\mathbf{W} = (W_1, \dots, W_d)$  be a vector of i.i.d. mean 0 and scale parameter 1 Laplace random variables and define  $\mathbf{T}(\mathbf{w}) = \mathbf{w} / \|\mathbf{w}\|_1$ . Introduce the notation

$$F(\mathbf{w}) \triangleq \|\mathbf{w}\|_1^{1/2} G(\mathbf{T}(\mathbf{w})) .$$

Lemma 1 in [30] asserts that, for  $\zeta$  uniformly distributed on  $\partial B_1^d$ ,

$$\mathbf{T}(\mathbf{W}) \stackrel{d}{=} \zeta \quad \text{and} \quad \mathbf{T}(\mathbf{W}) \text{ is independent of } \|\mathbf{W}\|_1 . \quad (4)$$

In particular,

$$\operatorname{Var}(F(\mathbf{W})) = d \operatorname{Var}(G(\zeta)) .$$

Using the Efron-Stein inequality [see e.g., 11, Theorem 3.1] we obtain

$$\operatorname{Var}(F(\mathbf{W})) \leq \sum_{i=1}^d \mathbf{E}[\operatorname{Var}_i(F)] ,$$

where

$$\operatorname{Var}_i(F) = \mathbf{E} \left[ \left( F(\mathbf{W}) - \mathbf{E}[F(\mathbf{W}) \mid \mathbf{W}^{-i}] \right)^2 \mid \mathbf{W}^{-i} \right]$$

with  $\mathbf{W}^{-i} \triangleq (W_1, \dots, W_{i-1}, W_{i+1}, \dots, W_d)$ . Note that on the event  $\{\mathbf{W}^{-i} \neq \mathbf{0}\}$  (whose complement has zero measure), the function

$$w \mapsto F(W_1, \dots, W_{i-1}, w, W_{i+1}, \dots, W_d) ,$$

satisfies the assumptions of Lemma 5. Thus,

$$d \operatorname{Var}(G(\zeta)) = \operatorname{Var}(F(\mathbf{W})) \leq 4 \sum_{j=1}^d \mathbf{E} \left[ \left( \frac{\partial F}{\partial w_j}(\mathbf{W}) \right)^2 \right] = 4 \mathbf{E} \|\nabla F(\mathbf{W})\|_2^2 . \quad (5)$$

In order to compute  $\nabla F(\mathbf{W})$ , we observe that for every  $i \neq j \in [d]$  we have for all  $\mathbf{w} \neq \mathbf{0}$  such that  $w_i, w_j \neq 0$

$$\frac{\partial T_i}{\partial w_j}(\mathbf{w}) = -\frac{w_i \operatorname{sign}(w_j)}{\|\mathbf{w}\|_1^2} \quad \text{and} \quad \frac{\partial T_i}{\partial w_i}(\mathbf{w}) = \frac{1}{\|\mathbf{w}\|_1} - \frac{w_i \operatorname{sign}(w_i)}{\|\mathbf{w}\|_1^2} .$$

Thus, the Jacobi matrix of  $\mathbf{T}(\mathbf{w})$  has the form

$$\mathbf{J}_{\mathbf{T}}(\mathbf{w}) = \frac{\mathbf{I}}{\|\mathbf{w}\|_1} - \frac{\mathbf{w}(\operatorname{sign}(\mathbf{w}))^\top}{\|\mathbf{w}\|_1^2} = \frac{1}{\|\mathbf{w}\|_1} \left( \mathbf{I} - \mathbf{T}(\mathbf{w})(\operatorname{sign}(\mathbf{w}))^\top \right) .$$

It follows that almost surely

$$\nabla F(\mathbf{W}) = \frac{1}{2\|\mathbf{W}\|_1^{1/2}} G(\mathbf{T}(\mathbf{W})) \operatorname{sign}(\mathbf{W}) + \frac{1}{\|\mathbf{W}\|_1^{1/2}} \left( \mathbf{I} - \mathbf{T}(\mathbf{W})(\operatorname{sign}(\mathbf{W}))^\top \right) \nabla G(\mathbf{T}(\mathbf{W})) .$$

Observe that since  $\langle \operatorname{sign}(\mathbf{W}), \mathbf{T}(\mathbf{W}) \rangle = 1$  almost surely, we have

$$\left( \operatorname{sign}(\mathbf{W}) \right)^\top \left( \mathbf{I} - \mathbf{T}(\mathbf{W})(\operatorname{sign}(\mathbf{W}))^\top \right) \nabla G(\mathbf{T}(\mathbf{W})) = 0 \quad \text{almost surely} .$$

The above two equations imply that almost surely

$$\begin{aligned} 4\|\nabla F(\mathbf{W})\|_2^2 &= \frac{d}{\|\mathbf{W}\|_1} G^2(\mathbf{T}(\mathbf{W})) + \frac{4}{\|\mathbf{W}\|_1} \left\| \left( \mathbf{I} - \mathbf{T}(\mathbf{W})(\operatorname{sign}(\mathbf{W}))^\top \right) \nabla G(\mathbf{T}(\mathbf{W})) \right\|_2^2 \\ &\leq \frac{d}{\|\mathbf{W}\|_1} G^2(\mathbf{T}(\mathbf{W})) + \frac{4}{\|\mathbf{W}\|_1} \|\nabla G(\mathbf{T}(\mathbf{W}))\|_2^2 (1 + \sqrt{d} \|\mathbf{T}(\mathbf{W})\|_2)^2 , \end{aligned}$$

where we used the fact that the operator norm of  $\mathbf{I} - \mathbf{a}\mathbf{b}^\top$  is not greater than  $1 + \|\mathbf{a}\|_2 \|\mathbf{b}\|_2$ . Combining the above bound with (5), and using the facts that  $\mathbf{E}[\|\mathbf{W}\|_1^{-1}] = \frac{1}{d-1}$ ,  $\mathbf{E}[G(\mathbf{T}(\mathbf{W}))] = \mathbf{E}[G(\zeta)] = 0$  and the independence of  $\|\mathbf{W}\|_1$  and  $\mathbf{T}(\mathbf{W})$  (cf. (4)) yields

$$d \left( 1 - \frac{1}{d-1} \right) \operatorname{Var}(G(\zeta)) \leq \frac{4}{d-1} \mathbf{E} \left[ \|\nabla G(\mathbf{T}(\mathbf{W}))\|_2^2 (1 + \sqrt{d} \|\mathbf{T}(\mathbf{W})\|_2)^2 \right] .$$

Rearranging, we deduce the first claim of the lemma since  $\mathbf{T}(\mathbf{W}) \stackrel{d}{=} \zeta$ .

To prove the second statement of the lemma regarding Lipschitz functions, it is sufficient to apply the first one to  $G_n$ —the sequence of smoothed versions of  $G$  such that  $G_n \in C^\infty(\mathbb{R})$  and

$$G_n \rightarrow G ,$$

uniformly on every compact subset, and  $\sup_{n \geq 1} \|\nabla G_n(\mathbf{x})\|_2 \leq L$  for almost all  $\mathbf{x} \in \mathbb{R}^d$ . A sequence  $G_n$  satisfying these properties can be constructed by standard mollification due to the fact that  $G$  is Lipschitz continuous [see e.g., 15, Theorem 4.2]. Finally, to obtain the value  $\mathbf{E}\|\mathbf{T}(\mathbf{W})\|_2^2 = \mathbf{E}\|\zeta\|_2^2$  we use Lemma 6 below.  $\square$

**Lemma 6.** *Let  $\zeta$  be distributed uniformly on  $\partial B_1^d$ . Then,  $\mathbf{E}\|\zeta\|_2^2 = \frac{2}{d+1}$ .*

*Proof.* We use the same tools as in the proof of Lemma 2. Let  $\mathbf{W} = (W_1, \dots, W_d)$  be a vector of i.i.d. random variables following the Laplace distribution with mean 0 and scale parameter 1. By (4) we have that  $\zeta \stackrel{d}{=} \frac{\mathbf{W}}{\|\mathbf{W}\|_1}$  and  $\zeta$  is independent of  $\|\mathbf{W}\|_1$ . Therefore,

$$\mathbf{E}\|\zeta\|_2^2 = \frac{\mathbf{E}\|\mathbf{W}\|_2^2}{\mathbf{E}\|\mathbf{W}\|_1^2} . \quad (6)$$

Here,

$$\mathbf{E} \|\mathbf{W}\|_2^2 = \sum_{j=1}^d \mathbf{E}[W_j^2] = d\mathbf{E}[W_1^2] = 2d . \quad (7)$$

Furthermore,  $\|\mathbf{W}\|_1$  follows the Erlang distribution with parameters  $(d, 1)$ , which implies

$$\mathbf{E} \|\mathbf{W}\|_1^2 = \frac{1}{\Gamma(d)} \int_0^\infty x^{d+1} \exp(-x) dx = \frac{\Gamma(d+2)}{\Gamma(d)} . \quad (8)$$

The lemma follows by combining (6) – (8).  $\square$

## C Upper bounds

The proofs of Theorems 1, 2, 3, 4 resemble each other. They only differ in the ways of handling the variance terms depending on  $\|\mathbf{g}_t\|_{p^*}^2$  and in the choice of parameters. For this reason, we suggest the interested reader to follow the proofs in a linear manner starting from the next paragraph.

**Common part of the proofs of Theorems 1, 2.** We start with the part of the proofs that is common for Theorems 1, 2. Fix some  $\mathbf{x} \in \Theta$ . Due to Assumption 1, we can use Lemma 1, which implies

$$\mathbf{E} \left[ \sum_{t=1}^T \langle \mathbf{E}[\mathbf{g}_t | \mathbf{x}_t], \mathbf{x}_t - \mathbf{x} \rangle \right] = \mathbf{E} \left[ \sum_{t=1}^T \langle \nabla f_{t,h}(\mathbf{x}_t), \mathbf{x}_t - \mathbf{x} \rangle \right] \geq \mathbf{E} \left[ \sum_{t=1}^T (f_{t,h}(\mathbf{x}_t) - f_{t,h}(\mathbf{x})) \right],$$

where  $f_{t,h}(\mathbf{x}) = \mathbf{E}[f_t(\mathbf{x} + h\mathbf{U})]$  with  $\mathbf{U}$  uniformly distributed on  $B_1^d$ . Furthermore, by the approximation property derived in Lemma 1 and the standard bound on the cumulative regret of dual averaging algorithm [see e.g., 26, Corollary 7.9.] we deduce that

$$\begin{aligned} \mathbf{E} \left[ \sum_{t=1}^T (f_t(\mathbf{x}_t) - f_t(\mathbf{x})) \right] &\leq \mathbf{E} \left[ \sum_{t=1}^T \langle \mathbf{E}[\mathbf{g}_t | \mathbf{x}_t], \mathbf{x}_t - \mathbf{x} \rangle \right] + Lb_q(d) \sum_{t=1}^T h_t \\ &\leq \frac{R^2}{\eta} + \frac{\eta}{2} \sum_{t=1}^T \mathbf{E} \|\mathbf{g}_t\|_{p^*}^2 + Lb_q(d) \sum_{t=1}^T h_t , \end{aligned} \quad (9)$$

where in the last inequality we used the identity  $\eta_1 = \dots = \eta_T = \eta$ . The results of Theorems 1, 2 follow from the bound (9) as detailed below.

*Proof of Theorem 1.* Here  $h_1 = \dots = h_T = h$ , and we work under Assumption 2. In this case, bounding  $\mathbf{E}\|\mathbf{g}_t\|_{p^*}$  in (9) via Lemma 4 yields

$$\mathbf{E} \left[ \sum_{t=1}^T (f_t(\mathbf{x}_t) - f_t(\mathbf{x})) \right] \leq \frac{R^2}{\eta} + 6(1 + \sqrt{2})^2 L^2 \cdot \eta T d^{1 + \frac{2}{q\lambda^2} - \frac{2}{p}} + LhTb_q(d) .$$

Minimizing the the right hand side of the above inequality over  $\eta > 0$  and substituting  $\eta = \frac{R}{L(\sqrt{6} + \sqrt{12})} \sqrt{\frac{d^{-1 - \frac{2}{q\lambda^2} + \frac{2}{p}}}{T}}$  we deduce that

$$\mathbf{E} \left[ \sum_{t=1}^T (f_t(\mathbf{x}_t) - f_t(\mathbf{x})) \right] \leq 2 \left( \sqrt{6} + \sqrt{12} \right) RL d^{\frac{1}{2} + \frac{1}{q\lambda^2} - \frac{1}{p}} \sqrt{T} + LhTb_q(d) .$$

Taking  $h \leq \frac{7R}{100b_q(d)\sqrt{T}} d^{\frac{1}{2} + \frac{1}{q\lambda^2} - \frac{1}{p}}$  makes negligible the second summand in the above bound. This concludes the proof.  $\square$

*Proof of Theorem 2.* Here again  $h_1 = \dots = h_T = h$ , but we work under Assumption 3. Then, bounding  $\mathbf{E}\|\mathbf{g}_t\|_{p^*}$  in (9) via Lemma 4 yields

$$\mathbf{E} \left[ \sum_{t=1}^T (f_t(\mathbf{x}_t) - f_t(\mathbf{x})) \right] \leq \frac{R^2}{\eta} + \eta T \left( \frac{d^{4 - \frac{2}{p}} \sigma^2}{h^2} + 6 \left( 1 + \sqrt{2} \right)^2 L^2 d^{1 + \frac{2}{q\lambda^2} - \frac{2}{p}} \right) + LhTb_q(d) .$$

Minimizing the right hand side of the above inequality over  $\eta > 0$  and substituting the optimal value

$$\eta = \frac{R}{\sqrt{T}} \left( \frac{d^{4-\frac{2}{p}} \sigma^2}{2h^2} + 6 \left(1 + \sqrt{2}\right)^2 L^2 d^{1+\frac{2}{q\lambda^2}-\frac{2}{p}} \right)^{-\frac{1}{2}},$$

results in the following upper bound on the regret

$$\begin{aligned} \mathbf{E} \left[ \sum_{t=1}^T (f_t(\mathbf{x}_t) - f_t(\mathbf{x})) \right] &\leq 2R\sqrt{T} \left( \frac{d^{4-\frac{2}{p}} \sigma^2}{2h^2} + 6 \left(1 + \sqrt{2}\right)^2 L^2 d^{1+\frac{2}{q\lambda^2}-\frac{2}{p}} \right)^{\frac{1}{2}} + LhTb_q(d) \\ &\leq 2 \left( \sqrt{6} + \sqrt{12} \right) RL \sqrt{T d^{1+\frac{2}{q\lambda^2}-\frac{2}{p}}} + \sqrt{2} R \sqrt{T} \frac{d^{2-\frac{1}{p}} \sigma}{h} + LhTb_q(d), \end{aligned}$$

where for the last inequality we used the fact that  $\sqrt{a+b} \leq \sqrt{a} + \sqrt{b}$  for  $a, b \geq 0$ . Minimizing over  $h > 0$  the last expression and substituting the optimal value  $h = \left( \frac{\sqrt{2}R\sigma}{Lb_q(d)} \right)^{\frac{1}{2}} T^{-\frac{1}{4}} d^{1-\frac{1}{2p}}$  we get

$$\mathbf{E} \left[ \sum_{t=1}^T (f_t(\mathbf{x}_t) - f_t(\mathbf{x})) \right] \leq 11.9RL \sqrt{T d^{1+\frac{2}{q\lambda^2}-\frac{2}{p}}} + 2.4\sqrt{RL\sigma} T^{\frac{3}{4}} \sqrt{b_q(d)} d^{\frac{1}{2}-\frac{1}{2p}}. \quad \square$$

**Common part of the proofs of Theorems 3, 4.** Here, we state the common parts of the proofs for Theorems 3, 4. Similar to the first inequality in (9), we have

$$\mathbf{E} \left[ \sum_{t=1}^T (f_t(\mathbf{x}_t) - f_t(\mathbf{x})) \right] \leq \mathbf{E} \left[ \sum_{t=1}^T \langle \mathbf{g}_t, \mathbf{x}_t - \mathbf{x} \rangle \right] + Lb_q(d) \sum_{t=1}^T h_t.$$

Note that without loss of generality, we can assume that  $\sum_{k=1}^t \|\mathbf{g}_k\|_{p^*}^2 \neq 0$ , for all  $t \geq 1$ . This is a consequence of the fact that if  $\sum_{k=1}^t \|\mathbf{g}_k\|_{p^*}^2 = 0$ , then the first term on the r.h.s. of the above inequality will be zero up to round  $t$ . Thus, we can erase these iterates from the cumulative regret, only paying the bias term for those rounds. In what follows we essentially use [27, Corollary 1], which we re-derive for the sake of clarity. Assume that  $\eta_t = \frac{\lambda}{\sqrt{\sum_{k=1}^{t-1} \|\mathbf{g}_k\|_{p^*}^2}}$  for  $t \in \{2, \dots, T\}$  and  $\lambda > 0$ . Then, applying [27, Theorem 1] we deduce that

$$\begin{aligned} \mathbf{E} \left[ \sum_{t=1}^T (f_t(\mathbf{x}_t) - f_t(\mathbf{x})) \right] &\leq \left( \frac{R^2}{\lambda} + 2.75 \cdot \lambda \right) \mathbf{E} \left[ \sqrt{\sum_{t=1}^T \|\mathbf{g}_t\|_{p^*}^2} \right] \\ &\quad + 3.5D \cdot \mathbf{E}[\max_{t \in [T]} \|\mathbf{g}_t\|_{p^*}] + Lb_q(d) \sum_{t=1}^T h_t, \end{aligned}$$

where we introduced  $D = \sup_{\mathbf{u}, \mathbf{w} \in \Theta} \|\mathbf{u} - \mathbf{w}\|_p$ . By [27, Proposition 1], we have  $D \leq \sqrt{8}R$ . Moreover, by Jensen's inequality, using the rough bound  $\mathbf{E}[\max_{t \in [T]} \|\mathbf{g}_t\|_{p^*}] \leq \sqrt{\sum_{t=1}^T \mathbf{E}[\|\mathbf{g}_t\|_{p^*}^2]}$ , and substituting  $\lambda = \frac{R}{\sqrt{2.75}}$ , we deduce that

$$\mathbf{E} \left[ \sum_{t=1}^T (f_t(\mathbf{x}_t) - f_t(\mathbf{x})) \right] \leq \left( 2\sqrt{2.75} + 3.5\sqrt{8} \right) R \sqrt{\sum_{t=1}^T \mathbf{E}[\|\mathbf{g}_t\|_{p^*}^2]} + Lb_q(d) \sum_{t=1}^T h_t. \quad (10)$$

Proofs of Theorems 3, 4 provided below follow from the above inequality by properly selecting  $h_t > 0$ .

*Proof of Theorem 3.* The bound of Lemma 4 under Assumption 2 applied to (10) yields

$$\begin{aligned} \mathbf{E} \left[ \sum_{t=1}^T (f_t(\mathbf{x}_t) - f_t(\mathbf{x})) \right] &\leq 2 \left( 2\sqrt{2.75} + 3.5\sqrt{8} \right) \left( \sqrt{3} + \sqrt{6} \right) RL \sqrt{T d^{1+\frac{2}{q\lambda^2}-\frac{2}{p}}} + Lb_q(d) \sum_{t=1}^T h_t \\ &\leq 110.53 \cdot RL \sqrt{T d^{1+\frac{2}{q\lambda^2}-\frac{2}{p}}} + Lb_q(d) \sum_{t=1}^T h_t. \end{aligned}$$

Taking  $h_t \leq \frac{7R}{200b_q(d)\sqrt{t}} d^{\frac{1}{2} + \frac{1}{q\lambda^2} - \frac{1}{p}}$  makes negligible the last summand in the above bound. This concludes the proof.  $\square$

*Proof of Theorem 4.* Using (10), the bound of Lemma 4 under Assumption 3 and the fact that  $\sqrt{a+b} \leq \sqrt{a} + \sqrt{b}$  for  $a, b \geq 0$ , we deduce that

$$\begin{aligned} \mathbf{E} \left[ \sum_{t=1}^T (f_t(\mathbf{x}_t) - f_t(\mathbf{x})) \right] &\leq \left( 2\sqrt{2.75} + 3.5\sqrt{8} \right) R \left( \sum_{t=1}^T \frac{d^{4-\frac{2}{p}} \sigma^2}{h_t^2} + 12(1 + \sqrt{2})^2 L^2 T \cdot d^{1+\frac{2}{q\lambda^2} - \frac{2}{p}} \right)^{\frac{1}{2}} \\ &\quad + Lb_q(d) \sum_{t=1}^T h_t \\ &\leq 110.6 \cdot RL \sqrt{T d^{1+\frac{2}{q\lambda^2} - \frac{2}{p}}} + 13.3R \cdot d^{2-\frac{1}{p}} \sigma \left( \sum_{t=1}^T \frac{1}{h_t^2} \right)^{\frac{1}{2}} \\ &\quad + Lb_q(d) \sum_{t=1}^T h_t . \end{aligned}$$

Since  $h_t = \left( 6.65\sqrt{6} \cdot \frac{R}{b_q(d)} \right)^{\frac{1}{2}} t^{-\frac{1}{4}} d^{1-\frac{1}{2p}}$  and  $\sum_{t=1}^T t^{\frac{1}{2}} \leq \frac{2}{3} T^{\frac{3}{2}}$  and  $\sum_{t=1}^T t^{-\frac{1}{4}} \leq \frac{4}{3} T^{\frac{3}{4}}$ , we get

$$\mathbf{E} \left[ \sum_{t=1}^T (f_t(\mathbf{x}_t) - f_t(\mathbf{x})) \right] \leq 110.6 \cdot RL \sqrt{T d^{1+\frac{2}{q\lambda^2} - \frac{2}{p}}} + 5.9 \cdot \sqrt{R} (\sigma + L) T^{\frac{3}{4}} \sqrt{b_q(d)} d^{\frac{1}{2} - \frac{1}{2p}} . \square$$

## D Definition of $\ell_2$ -randomized estimator

In this section we recall the algorithm of Shamir [33]. Let  $\zeta^\circ \in \mathbb{R}^d$  be distributed uniformly on  $\partial B_2^d$ . Instead of the gradient estimator that we introduce in Algorithm 1, at a each step  $t \geq 1$ , Shamir [33] uses

$$\mathbf{g}_t^\circ \triangleq \frac{d}{2h} (y'_t - y''_t) \zeta_t^\circ ,$$

where  $y'_t = f_t(\mathbf{x}_t + h_t \zeta_t^\circ)$ ,  $y''_t = f_t(\mathbf{x}_t - h_t \zeta_t^\circ)$ , and  $\zeta_t^\circ$ 's are independent random variables with the same distribution as  $\zeta^\circ$ .
